# Supplementary material
Source: ML conference proceedings conference paper supplement (https://openaccess.thecvf.com/content/CVPR2023/html/Wu_Incremental_3D_Semantic_CVPR_2023_paper.html)
Supplement: Supplementary file 2 [file Wu_Incremental_3D_Semantic_CVPR_2023_supplemental.zip]

Archive with 2 entries (2 files):
- 5050_incremental_3d_semantic_scene_-Camera-ready Supplemental Material/CVPR23_5050_MonoSSG_sup.pdf
- 5050_incremental_3d_semantic_scene_-Camera-ready Supplemental Material/MonoSSG_CVPR22_v1.0.mp4
